# Supplementary material
Source: Springer Nature journal article supplement (https://www.springermedizin.de/resource/supplementary/12879_2011_1744_MOESM4_ESM.pdf/9443926)

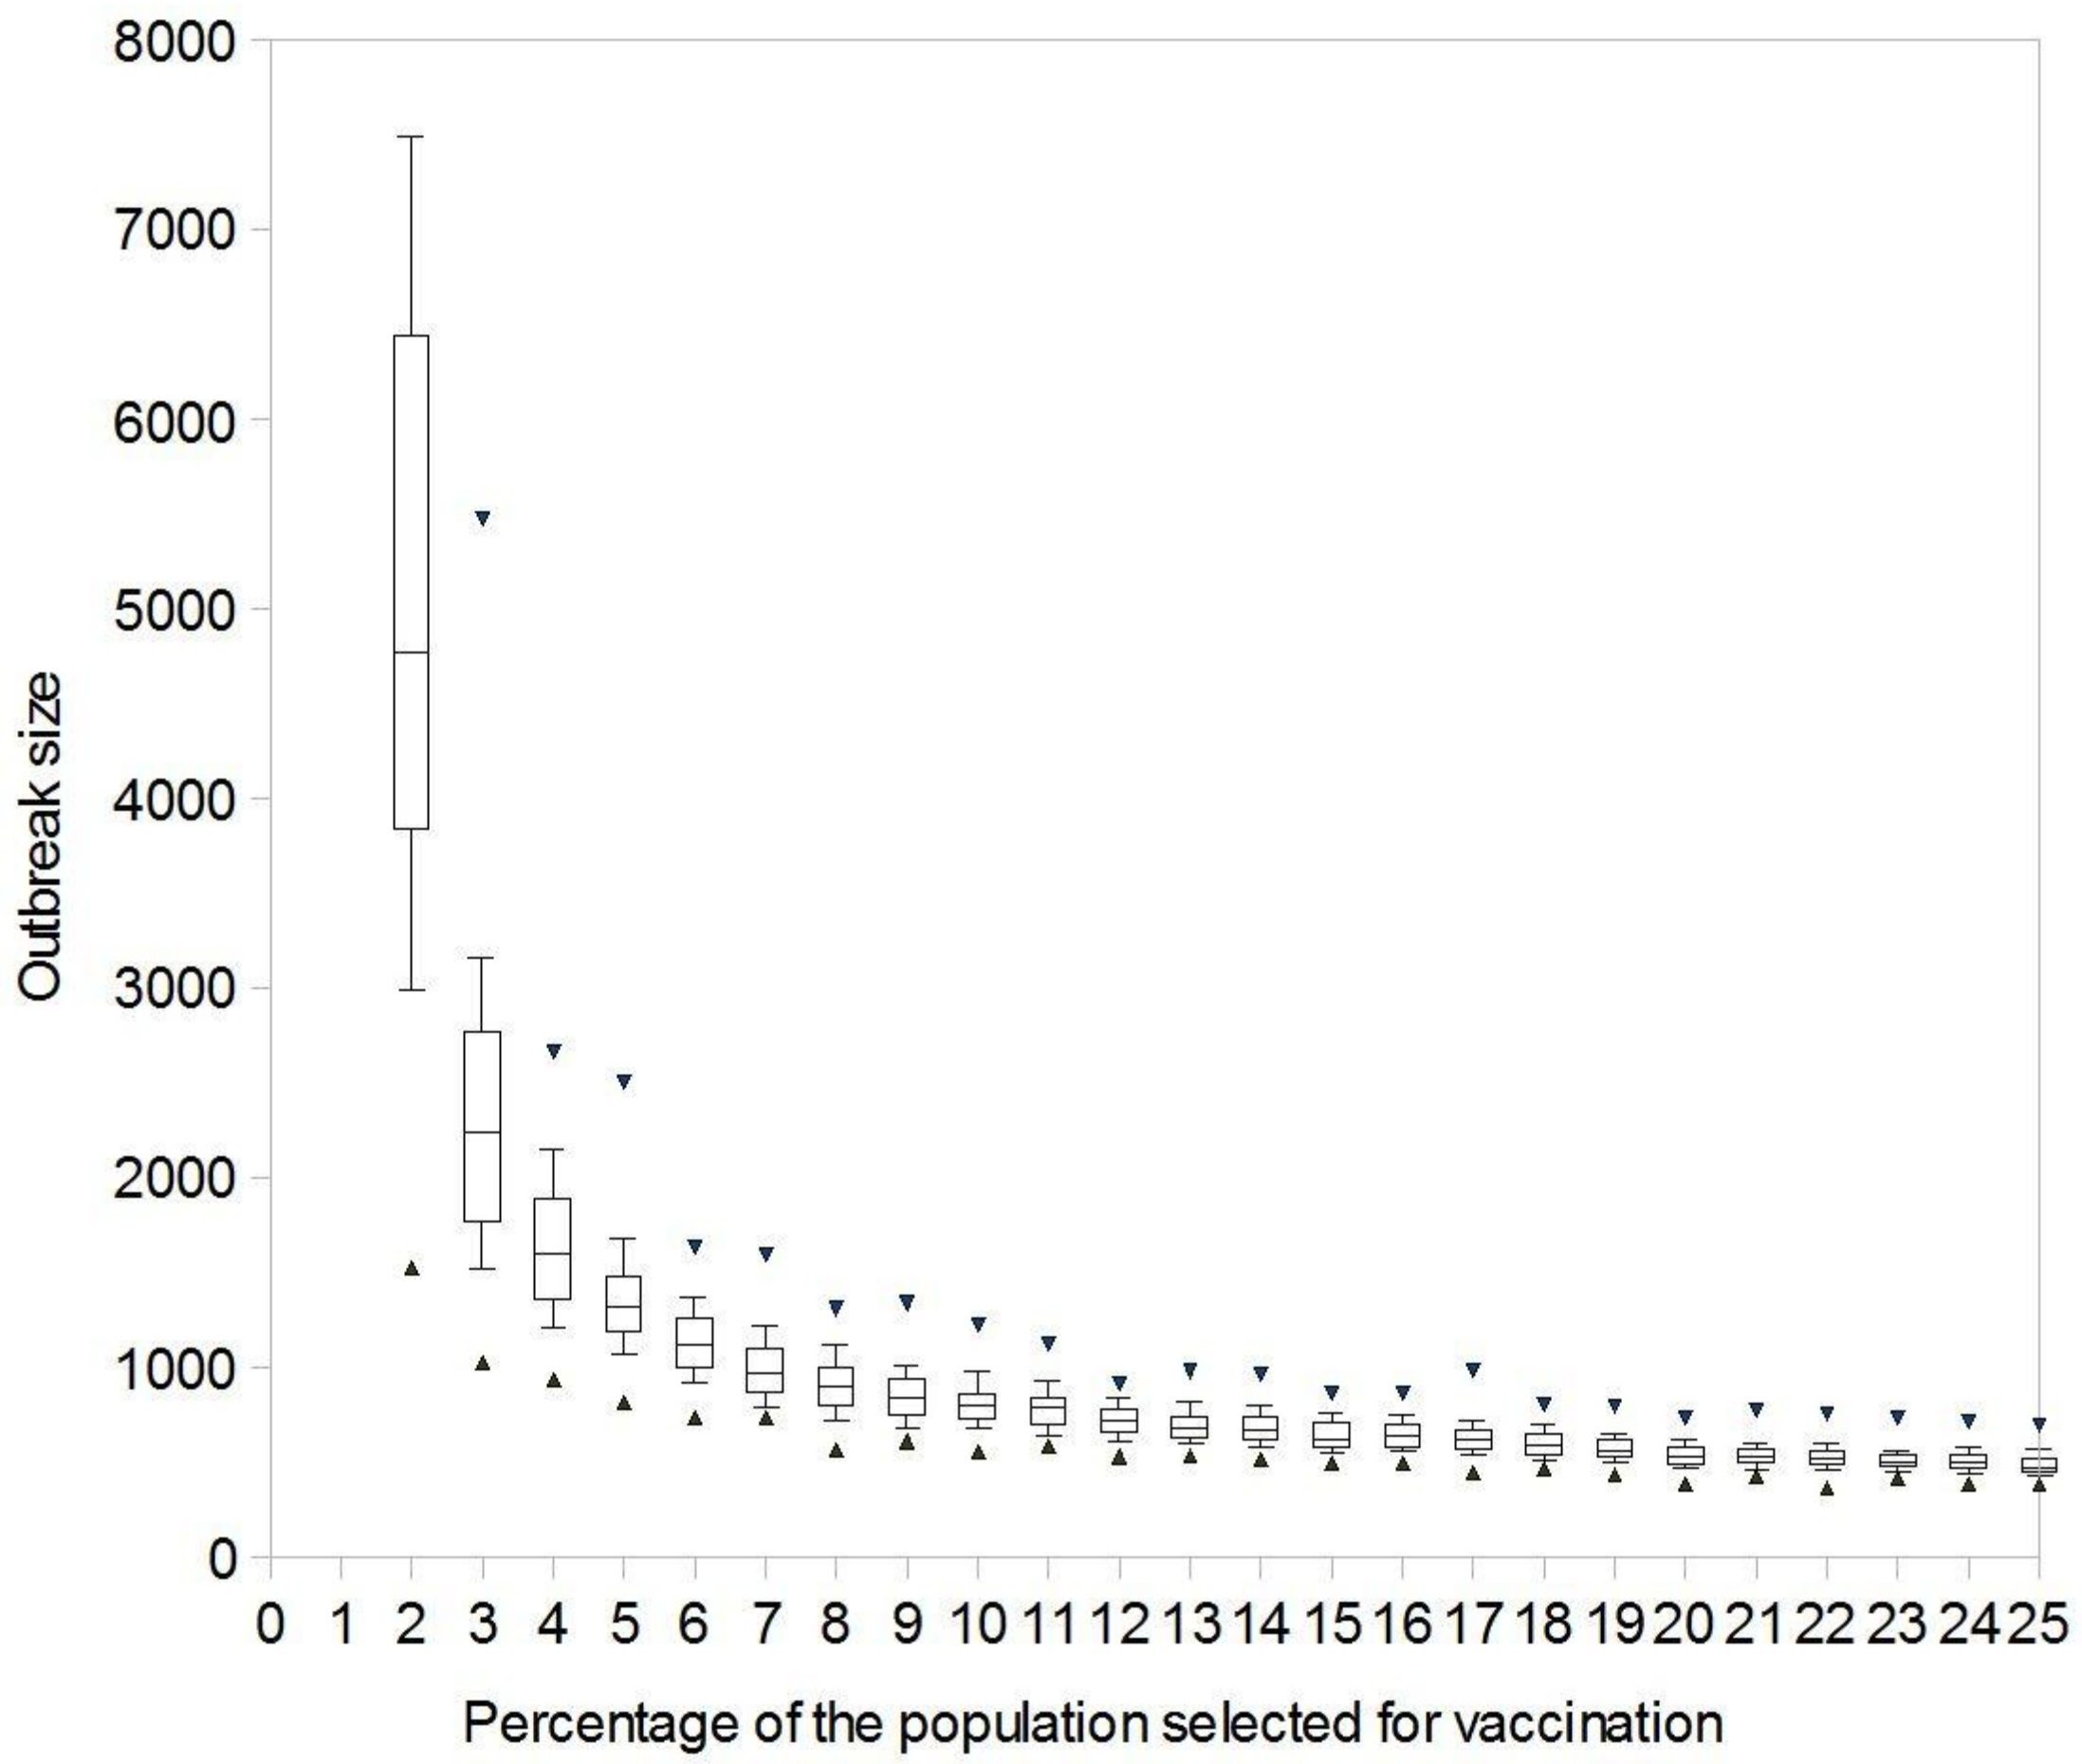

Supplement: MOESM4 [file 9443926]
